# Supplementary material for: Mars MOURA magnetometer demonstration for high resolution mapping on terrestrial analogues
Source: Copernicus journal article supplement (doi:10.5194/gi-2015-25), 2016-02-01
Supplement: Supplementary file [file gi-2015-25-AC1-supplement.pdf]

# Mars MOURA magnetometer demonstration for high resolution mapping on terrestrial analogues

Marina Diaz-Michelena<sup>1</sup>, Rolf Kilian<sup>2,3</sup>, Ruy Sanz<sup>1</sup>, Francisco Rios<sup>2</sup>, Oscar Baeza<sup>2</sup>

<sup>1</sup> Payloads and Space Sciences Department, INTA, Ctra. Torrejón – Ajalvir km 4, 28850 Torrejón de Ardoz, Spain

<sup>2</sup> Geology Department, University of Trier, Behringstrasse, 54286 Trier, Germany

<sup>3</sup> University of Magellanes, Punta Arenas, Chile

## Abstract

Satellite-based magnetic measurements of Mars indicate complex and very strong magnetic anomalies, which led to an intensive and long-lasting discussion about their possible origin. To make some progress in the investigation of the origin of these anomalies MOURA vector magnetometer was developed for in situ measurements on Mars. In this work we propose the utilisation of such instrument for future planetary on ground surveys. The proof of its suitability is done by testing on various terrestrial analogues characterised by most distinct magnetic anomalies of their basement rocks: (1) A magnetite body of EL Laco (up to + 110,000 nT) and its transition to surrounding andesites (< + 2,000 nT) in the Northern Andes of Chile showing the highest local magnetic anomalies. The magnetite-bearing ore body has highly variable local anomalies due to their complex formation history where a significant dispersion in paleo-orientations has been previously reported, while our vector data show relatively uniform and probably induced declinations. (2) A basaltic spatter cone of the Pali Aike volcanic field, in Southern Chile, was characterised by very strong magnetic anomalies along the crater rim (up to + 12,000 nT), controlled by the amount of single domain magnetites in the ground mass of the basalts. Due to their strong remanent signature paleodeclinations of the lavas and reorientations of collapsed blocks could be constrained by the vector data. (3) The Monturaqui meteorite crater (350 m diameter), in Northern Chile, shows significant variations of its anomalies (from - 2,000 to > + 6,000 nT) in restricted areas of several square metres along its crater rim related to unexposed iron-bearing fragments of the impactor while its granitic and ignimbritic target rocks exhibit only very weak anomalies. (4) An area with several amphibolitic dykes which cross-cut a Cretaceous granitoid in the southernmost Andes, where a decimetre-scale mapping was performed. In this case, pyrrhotite is the only magnetic carrier. It was formed during hydrothermal processes within the dykes. Very low (+ 40 to + 120 nT) positive magnetic anomalies clearly depict the amount of 1 to 4 vol.% pyrrhotite in these dykes, which is important as a mineralogical indicator as well as to detect associated gold and copper enrichment.

(355 words)

**Keywords:** Andes, El Laco, Monturaqui, Pali Aike, Patagonian Batholith, continental crust, martian crust, granite, basalt, mafic dykes, volcanic crater, magnetic anomalies, magnetic carrier, magnetic susceptibility, ground magnetic survey, caesium magnetometer, MOURA magnetometer, Koenigsberger ratios, plutonic rocks, impact crater, iron meteorite, pyrrhotite, magnetite, hydrothermal mineralization, gold, copper.

# 1. Introduction

Mars magnetic field has been exhaustively measured between 100 and 440 km altitude by Mars Global Surveyor (Acuña et al., 1998; Connerney et al., 2005; Morschhauser et al., 2014). These data show that the magnetic anomalies of the martian crust are up to 20 times higher than those of the Earth (Scott and Fuller, 2004). However, a profound understanding of the magnetic signature of the martian crust would require mapping at different altitudes and consequently with a different magnetic zoom apart from further petrological analyses. Since Mars presents a very low dense atmosphere, aeromagnetic surveys are not achievable in the short term. Thus, on ground magnetometry with landers and rovers seems to be the most immediate feasible technology to complement the satellite measurements. MOURA magnetometer was developed by INTA in the context of MetNet Precursor Mission to perform vector magnetometry and gradiometry during on ground prior to rover-based surveys on extra-terrestrial planets, like Mars. The instrument has a very low mass (72 g), a scalable range, high precision, low detectable fields and noise, and is capable to work in the very hard environmental conditions of Mars. Diaz-Michelena et al. (2015 a) describes MOURA main technical details, the calibration, as well as the demonstration to measure the absolute magnetic field and its temporal variations.

The first objective of the present work is to demonstrate the capability of the miniaturized MOURA instrument in a real context of terrestrial analogues surveys by means of the inter-comparison with the data of a scalar caesium reference magnetometer (Diaz-Michelena and Kilian 2013). To do this, four different sites with a wide variability in the intensity of their magnetic signatures have been selected. A second objective is the magnetic investigation of these sites and their implication as terrestrial analogues of Mars. A further objective is the potential of high resolution mapping to show the lowest magnetic contrasts in the terrain and their correlation with the distinct magnetic carriers responsible for their signatures (Acuña et al., 1998; Connerney et al., 2005; Lillis et al., 2013).

Our selected sites include magnetic anomalies from complex geological environments where e.g. noise factors, geometrical characteristics of non-exposed rock units and effects of the terrain relief can obscure partly the interpretations concerning the kind and magnetic effects of non-exposed rock units. Thus a modelling of the magnetic anomalies is desirable in general to improve the interpretation of geometrical and compositional effects of non-exposed rocks (e.g. Eppelbaum et al., 2015; Eppelbaum and Mishne, 2011; Jalongo et al., 2014). Since we are aware of this problematics, primarily we focus on the interpretation of the effects of distinct types and compositions of exposed rocks concerning the observed magnetic anomalies. Future more detailed studies of the investigated sites should include the above mentioned magnetic modelling which is out of the scope of this magnetometer demonstration.

## 2. Methodology

### 2.1. Magnetic Instrumentation

1 Two different magnetometers have been used for the present surveys: a conventional  
2 caesium scalar magnetometer: model G-858 MagMapper by Geometrics and MOURA  
3 vector magnetometer designed and developed by INTA MetNet team for Mars  
4 exploration.

5 G-858 is taken as the reference magnetometer because it is a well-established  
6 hand-held instrument (8 - 9 kg) for magnetic surveys (ordnance, archaeology,  
7 environmental, mineralogy and petroleum prospection). It has 8 hours autonomy,  
8 provides a suitable contrast related to magnetic anomalies (8 pT/VHz) and good  
9 stability covering the range of the Earth magnetic field with a dynamic range between  
10 20,000 to 100,000 nT. It also has several modes of operation: continuous and discrete  
11 to allow users to plan the prospections grids. In contrast to MOURA, this  
12 magnetometer only provides the intensity of the total magnetic field, its performance  
13 is dependent on the orientation of the head respect to the field, which changes  
14 significantly in the latitude range of the present survey, and it is restricted to areas  
15 with gradients higher than 20,000 nT/m (Table 1).

16 MOURA is a vector magnetometer with two 3-axes magnetic sensors of  
17 Anisotropic MagnetoResistance (AMR) by Honeywell to build up a compact and  
18 miniaturized instrument (72 g mass and 67.5 cm<sup>3</sup>) for Mars exploration. The power  
19 consumption is limited to 400 - 430 mW, so it can operate during more than 10 hours  
20 with commercial batteries, and insignificant increase of weight to the user (3 x 25 g).  
21 The instrument is also designed for continuous or discrete modes of operation, it can  
22 work in every orientation with no incidence in the performance, and it is practically  
23 immune to gradients due to the small size of the transducer ( $\mu\text{m}$ -size).

24 The characteristics are designed for Mars surface environment (- 90 to + 20 °C in  
25 operation, - 120 to + 125 °C in storage, and a total irradiance dose of 15 krad/s). The  
26 resolution is limited by the transducer (0.2 nT) and the range is adapted to that of the  
27 Earth geomagnetic field  $\pm$  65,000 nT with an extended range in the auto-offset  
28 compensation mode of  $\pm$  130,000 nT (Table 1, Diaz-Michelena et al., 2015 [a](#)).

## 29 30 2.2 *Track performance*

31  
32 The tracks have been defined to cover most of the relevant geological features of the  
33 selected areas. Continuous and discrete modes have been selected depending on the  
34 characteristics and heterogeneity of the sites. For example, the continuous mode has  
35 been applied in extended areas in order to have more flexibility and speed to move. In  
36 areas with very small-scale heterogeneities the discrete mode has been preferred. In  
37 these cases between 5 and 7 measurements have been taken and averaged per point.  
38 An advantage of this mode is that it can be measured directly on ground or at a fixed  
39 distance above ground.

40 The positions of measuring points and tracks have been georeferenced by a  
41 Garmin 62s GPS. The GPS tracks have been used to derive the orientation. For some  
42 relatively small mapping areas, like Bahía Glaciares (Site 4; Fig. 1), a grid of 20 x 20 m  
43 was previously defined by a tape measure since the error of GPS positions could be in  
44 the order of several metres. In these cases, the lines have been used for the  
45 orientation.

46 It has to be taken into account that the different data have been obtained from

1 multiple instruments individually without an automatic synchronism. Therefore, all the  
2 acquisition units have been manually synchronised, and the sequence of measurement  
3 has been done systematically as follows:

- 4 1) Marking selected measurement point.
- 5 2) GPS measurement with time stamp (with > 6 satellites at direct sight).
- 6 3) Removal of the GPS from measurement point to avoid magnetic contamination by  
7 this device.
- 8 4) Magnetic measurement with time stamp (for G-858).
- 9 5) Magnetometer (three axes), accelerometer (three axes), temperature  
10 measurement with time stamp (for MOURA).

11 The data files have been pre-processed manually (preliminary corrections of the  
12 GPS data with the above-described information). Ad-hoc software has been performed  
13 to include the temperature and tilt angles correction of MOURA data, to subtract the  
14 Earth geomagnetic field with respect to total intensities in the case of G-858 and each  
15 vector components in the case of MOURA, and to plot the different magnitudes of the  
16 processed data.

17 Local magnetic field anomalies have been calculated with respect to the  
18 International Geomagnetic Reference Field (IGRF) averaged for the month of the  
19 surveys. At single sites the surveys were performed during less than 2 hours for which  
20 global magnetic field data from a base station and/or from the next magnetic  
21 observatories with minute-resolution have been considered for reference (Argentine  
22 Islands near Antarctic Peninsula, Port Stanley and Easter Island and Huancayo ~ 1400  
23 km). However, since temporal variations during all survey intervals of single sites were  
24 less than  $\pm 10$  nT (quiet days), site specific data corrections have not been applied.

25 In all the surveys it has been systematically calculated the correlation parameters  
26 between the scalar data of the two magnetometers (G-858 and MOURA) as well as  
27 between the vector data of the two separate sensors of MOURA.

### 30 **2.3 Selected sites: mineralogical and geological context**

31 The selected test sites for the on ground survey are situated in or near the Southern  
32 Andes between latitudes 20°S to 52°S (Fig. 1).

33 Required general site characteristics are that a) exposed rocks are relatively  
34 unaltered, b) high resolution grids with scales of metres to centimetres can be  
35 performed, and c) exposed rocks are representative for a large number of martian  
36 surface rocks.

37 SITE 1 “El Laco”. Four large magnetite bodies with a total estimated ore resource of  
38 500 million tons crop out around El Laco volcano in the Central Andes (Fig. 2A; Alva-  
39 Valdivia et al., 2003; Naranjo et al., 2010). Together with the iron ore deposits of  
40 Kiruna (e.g. Jonnsson et al., 2013) they represent worldwide unique examples for very  
41 strong local magnetic anomalies, which may be comparable to that observed in some  
42 areas of the southern Noachian highlands of Mars (Connerney et al., 2005; Lillis et al.,  
43 2013).

44 The selected area with an extension of 0.2 x 0.4 km is situated at the northern  
45 margin of the El Laco Sur outcrop (23°50'17''S; 67°29'27'' W; 4720 m elevation; Figs. 1

1 and 2), at the transition between magnetite-bearing ores and early Pleistocene  
2 andesitic lava flows which are partly covered by pyroclastic deposits with up to 5 m  
3 thickness. The mapping area has not been modified by iron ore mining.

4 Sernageomin (*Servicio Nacional de Geología y Minería* of Chile; Naranjo et al.,  
5 2010) performed aeromagnetic surveys and constructed maps of the anomaly. They  
6 reflect a dipolar anomaly according to the isodynamic lines of the map with intensities  
7 in the order of  $\pm 150$  nT (Alva-Valdivia et al., 2003). However, there is no information  
8 available concerning the tracks of these aeromagnetic surveys: spacing and altitudes  
9 above ground, because of which, the data are only considered for completeness.  
10 Besides, on ground magnetic surveys have not been done previously.

11 Fission-track dating of apatite grown within the magnetites gave an age of  $2.1 \pm$   
12  $0.1$  Ma (Maksaev et al., 1988). A whole rock age of the andesite from the host rocks of  
13 Pico Laco is  $2.0 \pm 0.3$  Ma (Gardeweg and Ramírez, 1985).

14 The origin of the magnetite bodies has been strongly debated. A combined  
15 magmatic and hydrothermal origin was proposed by Alva-Valdivia et al. (2003), Sillitoe  
16 and Burrows (2002), and Velasco and Tornos (2012). This is based on the fact that field  
17 and petrographic evidences suggest that some magnetites have a primarily magmatic  
18 texture, whereas others show features which indicate a formation during a  
19 hydrothermal triggered re-emplacement of andesitic lava flows. Trace element  
20 compositions of the latter magnetite type are not compatible with a magmatic origin.  
21 For example, Dare et al. (2014) document that these magnetites are characterized by  
22 high Ni/Cr ratios, depleted in Ti, Al, Cr, Zr, Hf and Sc, and show an oscillating zoning of  
23 Si, Ca, Mg and rare earth elements. In contrast, oxygen isotope data ( $\delta^{18}\text{O}$  of +2 to +4)  
24 of many magnetites support a magmatic rather than hydrothermal origin (Jonsson et  
25 al., 2013).

26 Microscopy studies under reflected light as well as temperature dependent  
27 susceptibility measurements and isothermal remanent magnetization (IRM) acquisition  
28 show that low Ti-magnetite and/or maghemite are the magnetic carriers (Alva-Valdivia  
29 et al., 2003). Sometimes ilmenite-hematite minerals appear in significant amounts.  
30 Grain sizes range from a few microns up to several millimetres. Hysteresis  
31 measurements of Alva-Valdivia et al. (2003) of seven ore samples from El Laco Sur  
32 point to pseudo-single-domain status and show a large range of Koenigsberger ratios  
33 (Q-ratios from 0.02 to > 1000).

34 Paleomagnetic data show distinct local declinations indicating a complex  
35 crystallization history, probably during different geomagnetic field orientations (Alva-  
36 Valdivia et al., 2003).

37 SITE 2 “Pali Aike”. Lava sheets with volcanic spatter cones represent a common feature  
38 in many areas of the surface of Mars (Kereszturi and Németh, 2012; Robbins et al.,  
39 2013). On Earth such volcanic rocks often exhibit distinct magnetic anomalies (e.g.  
40 Bolos et al., 2012; Urrutia-Fucugauchi et al., 2012). However, only few examples have  
41 been mapped with high resolution (e.g. Cassidy and Locke, 2010).

42 Thus, an agglutinated spatter cone of 170 m diameter and surrounding Quaternary  
43 lava sheet of the Pali Aike Volcanic Field (PAVF) in southernmost Patagonia (Figs. 1 and  
44 3; Skewes and Stern, 1979) has been selected as potential martian analogue. The well-

1 preserved morphology and stratigraphy indicates an age of approximately 1.0 Ma  
2 when considering the succession of various nearby volcanic formations for which ages  
3 of 0.16 to 1.5 Ma have been reported (Mejia et al., 2004). The investigated crater is  
4 partly filled by pyroclastic material, eolian sediments as well as blocks and detritus,  
5 which have been collapsed from the eastern inner crater wall.

6 The mapping site (52°06'43''S; 69°42'28''W; 227 m elevation) covers an area of  
7 400 x 400 m, including the crater and its surroundings (Fig. 3A).

8 SITE 3 “Monturaqui”. Impact craters represent a very frequent feature on the Mars  
9 surface (Lillis et al., 2013). Depending on e.g. size, target rocks, impactite composition  
10 and possible hydrothermal processes they can be characterised by distinct and  
11 complex magnetic signatures (e.g. Osinski et al., 2013). On Earth, large impact craters  
12 are strongly eroded. In addition, some of them are covered by vegetation or modified  
13 by anthropogenic influences. A Late Pleistocene simple type impact crater in the  
14 Atacama Desert of northern Chile was selected for this case study (Fig. 1). The crater  
15 was discovered in 1962 from aerial photographs and firstly described by Sánchez and  
16 Cassidy (1966). It is located at latitude 23°55'40''S and longitude 68°15'42''W at an  
17 elevation of 2984 m (Ugalde et al., 2007), has a diameter of 370 m and is 34 m deep  
18 (Fig. 4 A, B, C), and was formed during the Quaternary ( $660 \pm 90$  kyr BP; Ukstins Peate  
19 et al., 2010). Due to the arid climate, it remained morphologically well preserved. The  
20 crater has remarkable morphological similarities to the Bonneville impact crater on  
21 Mars, which was explored by the Spirit rover of NASA (Grant et al., 2004). Monturaqui  
22 target rocks include Jurassic granites cut by some mafic dykes. Both rock types are  
23 overlain by a several metre thick sheet of Pliocene ignimbrites. Tiny Fe-Ni-Co-P  
24 spherules, all bound in impact glass, have been found within the ejecta blanket. They  
25 suggest an iron meteorite as impactor (Bunch and Cassidy, 1972; Kloveranz, 2010).

26 SITE 4 “Bahía Glaciares”. Plutonic rocks and layered intrusions form significant parts of  
27 the martian crust (e.g. Francis, 2011) and analogues on Earth (McEnroe et al., 2004  
28 and 2009). These rocks may have the capacity to store remanent magnetic signatures  
29 that can be used to distinguish between different magmatic rock types during future  
30 rover-based magnetic surveys. The Patagonian Batholith in the southernmost Andes  
31 provides a good example of continental crust formation on Earth and other planets  
32 (Behrmann and Kilian, 2003; Diaz-Michelena and Kilian, 2015). A small mapping area  
33 of 20 x 6 m (120 m<sup>2</sup>) was defined on a Cretaceous granite (Fig. 5; Hervé et al., 2007),  
34 which is cross-cut by several mafic North-trending (~ 5 °N) more or less parallel mafic  
35 dykes (52°48'28''S; 73°14'10''W; 11 m a.s.l.). This area was chosen because it is a  
36 good example of very low intensity magnetic contrast in a small extension, where  
37 transition between alternating mafic and felsic outcrops appears at a centimetre-  
38 scale.

## 39 40 **2.4 Additional analyses**

41  
42 The magnetic field surveys have been complemented with other rock analyses to  
43 improve the interpretation of the magnetic signatures of the surveys. Even though the  
44 detailed analysis is out of the scope of this work, the types of measurements are  
45 briefly described because they support partially some of the conclusions of the work.

46 Firstly, a macroscopic description of the rock types and mineral components has

1 been done at each site. Representative rock samples were collected along the tracks  
2 for macroscopic investigation and future analyses in the laboratory. For instance, the  
3 samples from Pali Aike (Site 2) and Bahía Glaciares (Site 4) have been analysed with  
4 polarization and refracted light microscopy of thin sections of the rocks. Texture and  
5 grain sizes of samples from el Laco (Site 1) have been also investigated with a scanning  
6 electron microscope (Leo 435 VP, Geology Department, Trier University). The mineral  
7 composition of granites and amphibolitic dykes of Bahía Glaciares (Site 4) have been  
8 analysed by an X-ray diffractometer (Siemens D500, Geology Department, Trier  
9 University).

10 Hysteresis properties of representative samples from Pali Aike (Site 2) and Bahía  
11 Glaciares (Site 4) have been characterized magnetically at room temperature by means  
12 of a vibrating sample magnetometer at the Space Magnetism Laboratory of INTA,  
13 Spain. Magnetic susceptibilities have been also measured with a MS-2 susceptometer  
14 by Bartington along the transects at Site 4.  
15

### 16 17 **3. Results** 18

19 The comparative performance and results of the magnetic surveys with MOURA and G-  
20 858 magnetometers are described below. In all cases with identical single point  
21 measurements the correlation between the two instruments and the two sensors of  
22 MOURA has been analysed. The number of differences among the distinct sites has  
23 made it possible to demonstrate the versatility of MOURA. Thus, in each study case  
24 some of the individual capabilities of the instrument will be highlighted and discussed.  
25

#### 26 **3.1 SITE 1 “El Laco”**

27 The surveys were performed with both instruments using continuous and discrete  
28 measurement modes. During the surveys the temperature was ranging from 5°C to  
29 27°C. The transects and individual measuring points were georeferenced with the GPS.  
30 A Matlab code was used to combine, interpolate and merge the magnetic anomalies  
31 and tracks (Fig. 2). The vertical magnetic gradient has been measured at one point  
32 where magnetite-bearing ores crop out. Fig. 2B shows an exponential increase of the  
33 magnetic anomaly from 1.9 m altitude above the ground down to the rock surface  
34 (from + 3,000 to +23,000 nT). The gradient field calculated from the vector  
35 components of both vector sensors shows a strong negative vertical component ( $m_z = -$   
36 11.7 A/m) for this point, which has been modelled by a local shallow superficial dipole  
37 with a volume of 0.1 x 0.1 x 0.4 m, an inclination of -62° and a declination of -67°.

38 The magnetite-bearing outcrops exhibit very high positive magnetic anomalies  
39 from 30,000 to >110,000 nT while surrounding andesitic lavas and pyroclastic material  
40 have much lower positive anomalies (+ 100 to + 2,000 nT). The magnetic anomalies  
41 across outcrop transitions between andesites and magnetite-bearing ores have been  
42 measured with MOURA in a discrete mode directly on the ground (Fig. 2C) and with a  
43 continuous mode (Fig. 2D). The differences in the intensity of andesite anomalies  
44 between these two measurements are related to the different and slightly variable  
45 distance between the hand-held sensor (25 to 30 cm) and the ground surface of single  
46 points (0 cm). The continuous measurements show a large variability of the magnetic  
47 anomalies along the ore-bearing outcrops related to either heterogeneous ore

1 compositions or slight variations of the sensor distance from the surface.

2 During G-858 surveys the magnetometer became often saturated when high local  
3 magnetic anomalies were reached (> 80,000 nT). Local surveys with a higher spatial  
4 resolution in a continuous mode showed that this situation appeared very frequently  
5 and thus did not permit a complete high-resolution survey with this instrument. The  
6 surveys with MOURA were not affected by such saturation since this magnetometer  
7 has an extended range mode (auto) that doubles the nominal range to  $\pm 130,000$  nT  
8 per axis, and thus, allows measurements up to higher field intensities as it has been  
9 suggested partly for the martian surface. Despite this problem with the G-858 the  
10 scalar magnetic maps of both magnetometers are similar with a correlation  $R^2 > 0.8$ .  
11 (comparison in Figs. 2E and 2F). Of relevant importance is that MOURA magnetometer  
12 allows the identification of the component that saturates.

13 Since MOURA magnetometer provides vector magnetic data, it is possible to  
14 determine the orientation of the field in the area. This is shown in the rosette of Fig.  
15 2G together with the paleodeclinations of other rock samples from El Laco Sur  
16 determined by Alva Valdivia et al. (2003).

17

### 18 **3.2. SITE 2 “Pali Aike”**

19 A dense grid was performed over the depicted surface with G-858 magnetometer (Fig.  
20 3A). In this case, MOURA measurements have been performed with the discrete mode  
21 (Fig. 3B) to obtain well-referenced vector data. During the survey, the temperature  
22 was oscillating between 7 to 15° C.

23 Fig. 3B compares an interpolated magnetic anomaly map measured with G-858  
24 with discrete points from MOURA that are illustrated with a colour code. Both data  
25 sets match very well ( $R^2 > 0.82$ ). A 3-D view of the interpolated magnetic anomalies  
26 mapped with G-858 is shown in Fig. 3C. It documents the very high positive anomalies  
27 of the crater rim (up to + 12,000 nT). A W-E transect of the crater and its surroundings,  
28 and its geological features shows two pronounced positive magnetic anomalies  
29 centred at both sides of the crater rim where the agglutinated spatter have been  
30 mainly deposited as pillow-like blocks of metre size (Fig. 3D).

31 Vector information obtained with MOURA magnetometer at the individual points  
32 along the crater rim and crater infill is illustrated in Fig. 3E. In general the predominant  
33 declination in all the measurements taken on consolidated lava blocks and the  
34 sedimentary infill is around 355°N (white arrows in Fig. 3E). However, anomalous  
35 deviations have been detected in the Eastern and Southern part of the crater (red  
36 arrows in Fig. 3E), on single basaltic lava blocks, which have removed into the crater  
37 during a post-eruptive collapse of the inner crater wall.

38 MOURA has two magnetometers at a small distance of 10 mm between them.  
39 They can be used also to measure some of the components of the gradient of the field.  
40 Fig. 3G shows the derivatives respect to z of the components Bx, By and Bz of the field.  
41 In good agreement with the previous conclusion, the gradient seems to have a  
42 homogeneous direction all over the crater with the exception of measurements on  
43 single lava blocks that have been removed and re-orientated during the collapse of the  
44 wall.

1 For, all these data it has been taken into account the tilt angle of MOURA apart  
2 from the deviation respect to the North taken with the GPS. This has been possible due  
3 to the fact that MOURA has a tilt angle sensor to measure the deviation from the  
4 horizontal. This sensor has been used in this example to derive a gravity contrast along  
5 the transect within the crater and along its rim which is illustrated in Fig. 3F. Highest  
6 values occur along the eastern and western crater rim whereas lowest values are  
7 measured at the western eolian sedimentary crater infill. This relationship is shown in  
8 the W-E transect of Fig. 3D.

### 9 10 **3.3. SITE 3 “Monturaqui”**

11 In this example we performed a dense grid of the centre of the crater as well as the  
12 northeastern, eastern and southern part of the crater rim. An interpolated map shows  
13 very slight magnetic anomalies (< 50 nT) within the crater (Fig. 4B) whereas more  
14 pronounced local negative and positive anomalies from - 400 to > + 600 nT occur  
15 within several meters along the crater rim indicating the existence of metre-sized  
16 dipoles. The anomalies are not related to outcrops of exposed granitoids and  
17 ignimbrites (Fig. 4C).

18 A higher-resolution mapping was performed at a local area of around 10 x 20 m at  
19 the north-eastern crater rim with both magnetometers in a continuous mode with G  
20 858 and by discrete points with MOURA. Both magnetometers show relatively high  
21 positive and negative anomalies ranging from - 3,500 up to > + 6,000 nT (Fig. 4D). This  
22 local field of anomalies indicate the existence of not exposed but near-surface metre-  
23 sized dipoles. The anomalies measured with both magnetometers are compared in an  
24 X-Y plot of Fig. 4E and indicate a correlation of  $R^2$  of 0.81.

25 The local mapping area at the north-eastern crater rim is characterised by  
26 pronounced local topography changes in the range of  $\pm 5$  m of elevation. Fig. 4F  
27 illustrates that more pronounced negative anomalies occur at topographic lows. This  
28 relationship between lower topography points and higher positive anomalies (and vice  
29 versa) was also measured with the B1 and B2 sensors of MOURA and is shown in Fig.  
30 4G. This figure documents also the good correlation between both MOURA sensors, B1  
31 showing on average + 1,500 to + 2,000 nT higher values than B2 related to the fact that  
32 B1 is 10 mm nearer to the ground surface.

### 33 34 **3.4 SITE 4 “Bahía Glaciares”**

35 A 20 x 20 m area was mapped with G-858 and MOURA magnetometers along seven  
36 high-resolution tracks perpendicular to the dykes (Fig. 5B to 5D) using both continuous  
37 and discrete modes. The spacing between the lines is approximately 80 cm and the  
38 distance between individual measurement points along the lines range from 5 to 10  
39 cm. All the lines show similar patterns, which allow performing an interpolated map of  
40 the area: Figs. 5C and 5D show that the dykes clearly contrast with the granites by  
41 slight positive anomalies.

42 Fig. 5E shows one of the high-resolution transects where the magnetic signatures  
43 have been measured with both magnetometers and a M2 Bartington device for  
44 susceptibilities. The dykes exhibit very clear but weak positive anomalies with respect  
45 to the granite in the range from + 20 to + 80 nT. Both magnetometers show similar

1 patterns ( $R^2 > 0.8$ ). Overall slightly higher values (around 30 nT) of MOURA data are  
2 attributed to the fact that they have been performed directly on the rock surface  
3 whereas those of G-858 magnetometer are measured at a certain distance to the  
4 surface (25 to 30 cm). The susceptibility transect shows a very sharp transition at the  
5 interfaces between the granite and dykes, the latter having around  $70 \times 10^{-6}$  SI higher  
6 values on average.

7 The magnetic anomalies and the susceptibility data show laterally displaced (Fig.  
8 6A, B). This reflects the eastward tilt of the dykes which have dipping angles of 50 to  
9  $80^\circ$  and indicates that the uppermost 2-3 m of the mafic dykes are also integrated  
10 within the anomalies measured with both magnetometers while the susceptibility  
11 shows only the information of the first centimetres below the surface.

12 Detailed petrographic studies including electron microprobe and XRD analysis  
13 show that both granites and amphibolitic dykes do not contain magnetite, but instead  
14 include ferromagnetic monoclinic C4 pyrrhotite as magnetic carrier. Areal microscopic  
15 mapping of pyrrhotite in thin sections of the different dykes and the granite and XRD  
16 analyses of the different rocks indicate a content of 1 to 4 vol.% pyrrhotite with grain  
17 sizes ranging from  $< 5$  to  $150 \mu\text{m}$ . There is a good correlation between the pyrrhotite  
18 contents of the different dykes and the amount of the positive anomalies (Fig. 5E).

## 21 4.0 Discussion

23 The results of the different ground magnetic surveys of both magnetometers are  
24 discussed with respect to the appropriateness of the different instruments and the  
25 relationship to mineralogical and magnetic properties of the exposed rocks. In  
26 particular the potential of high-resolution detection of weak magnetic contrast  
27 between different surface rock types is considered.

### 29 4.1 Instrument Performance

30 Final processed data from both instruments show a very good correlation in intensity  
31 of magnetic anomalies (in all cases  $R^2 > 0.8$ ) for the overall measurement range  
32 between - 2,000 nT and 100,000 nT (Figs. 2E, 2F, 3C, 4E and 5E).

33 The stability of both instruments has been appropriate for the different  
34 surveys. G-858 MagMapper shows a better thermal stability, which can be observed  
35 during faster temperature variations during the dawn and dusk, when the transducer  
36 may experiment thermal variations up to  $0.1 \text{ }^\circ\text{C}/\text{min}$ . The simultaneous measurement  
37 of the temperature and the magnetic field during the prospections diminishes this  
38 problem, which can be neglected in areas with magnetic anomalies  $> 100 \text{ nT}$ , but the  
39 error can be significant (1 %) in low contrast anomalies (1 nT), also due to the  
40 resolution of MOURA instrument. Other ways to compensate the temperature effects  
41 could improve these errors (Díaz-Michelena et al., 2015 b). For static measurements  
42 the simultaneous temperature measurement corrects very well the magnetic field data  
43 (Díaz-Michelena et al., 2015 a).

44 Regarding the dynamic range, both magnetometers have also casted  
45 appropriate results in most of the cases. The limitation in this feature affects in a  
46 different way the response of both instruments. G-858 is influenced in the measured

1 modulus of the field, while MOURA is affected separately in every axis. Apart from the  
2 extension of the range in modulus, this is an advantage since it could provide useful  
3 data in two directions despite of saturation in the other axis. For example, at Site 1,  
4 the huge intensity of the anomalies makes it impossible to map them with G-858,  
5 while MOURA can measure them in the auto mode, when the maximum offset is  
6 applied.

7 At the El Laco site MOURA surveys were performed with discrete and  
8 continuous modes. The continuous mode enabled a higher resolution and an easier  
9 performance but it may include a shifting by slight variations of the distance between  
10 sensor and the ground. The extreme high gradient at this site causes a pronounced  
11 fluctuation of around  $> 5,000$  nT when altitude of the sensor changes from 25 to 30  
12 cm. This can be avoided by discrete measurements directly on the ground, which also  
13 enable a better orientation control of the vector sensor. In the case of highly positive  
14 anomalies and in combination with high Q-ratios (remanent versus induced magnetic  
15 signatures) of the surface rocks, the vector measurements may also have the capability  
16 for paleomagnetic implications which is extremely important for planetary exploration.

17 Surface rock alteration processes which modify the magnetic signatures have  
18 influence on limited areas. In particular, the related mineral transformations processes  
19 are a direct consequence of the contact of the rocks with the hydrosphere and  
20 atmosphere, and their influence depth is limited to several tens of metres. This fact  
21 together with the exhumation processes offers often the possibility to correlate the  
22 measured direction of the magnetization with the coetaneous paleomagnetic field. In  
23 the case of Mars, where the main source of field is the remanent magnetization,  
24 oriented measurements does not only contain information on the carriers and the  
25 possible alteration effects suffered by them, but also record the paleomagnetic field  
26 orientation. This possible tool has been applied to remanence dominated sites which is  
27 further discussed in section 4.2.

28 The sensor head orientation is also a matter of discussion. Despite the good  
29 signal-to-noise ratio presented by the scalar magnetometer, it is affected by the  
30 relative orientation of the head and the magnetic field vector. This is highly improved  
31 in a 3-axes magnetometer like MOURA.

32 Another consideration is the gradient immunity and capability to derive a  
33 gradient of the field of the instruments. On the one hand, MOURA instrument presents  
34 a better gradient immunity, which makes it very suitable to map areas with high  
35 frequency patching of the signatures. For example, it is very appropriate to perform  
36 decimetre-scale resolution mappings like in the cases of El Laco, Monturaqui and Bahía  
37 Glaciares. G-858 presents troubles with not so high gradients ( $> 20,000$  nT).

38 On the other hand, the inclusion of a second head (and therefore to have two  
39 3-axes magnetometers) in MOURA instrument offers the capability to better  
40 understand the characteristics and depths of the sources. This cannot be applied to  
41 deep and extended magnetic sources, because the distance between the two  
42 magnetometers is very small (10 mm) but it is useful to analyse near surface  
43 heterogeneities and will be discussed in section 4.2.

44  
45  
46 **4.2 Capacity for high resolution mapping with tracing of mineralogical and**  
47 **geological characteristics**

1 High-resolution ground surveys may indicate compositional variations in soils and/or  
2 uppermost crustal rocks, depending on the magnetic contrast between different  
3 exposed rocks and the intensity of active magnetic field (Gobashy et al., 2008; Hinze et  
4 al., 2013). Despite the fact that it is not the primary goal of MOURA instrument, which  
5 is part of the instruments suite of a lander, due to its potential in future exploration  
6 missions, the exploration capacity of the commercial G-858 and MOURA  
7 magnetometer for extra-terrestrial high-resolution mapping is discussed in the  
8 following for the different investigated sites.

## 9 10 **El Laco**

11 At this site the intensities in the magnetic anomalies range from 0 to + 110,000 nT  
12 (Figs. 2C to 2F) which is unique compared to other magnetic mapping results on Earth  
13 (e.g. Hinze et al., 2013). The magnetic contrast at the surface transition between  
14 andesitic rocks and magnetite-bearing ores is very sharp and extremely high. A change  
15 from + 1,200 to + 80,000 nT appears in less than a metre distance. In general, MOURA  
16 data show a better definition of the surface rock transitions and local variabilities in  
17 the areas with outcrops of magnetite-bearing ores compared to G-858. Furthermore,  
18 G-858 could not register some of the anomalies because its response was occasionally  
19 saturated (110,000 nT) (Fig. 2D). Some variations in areas with exposed ores (in the  
20 order of  $\pm 5,000$  nT) could have been caused by slight changes in the sensor distance  
21 from the ground during a continuous measuring mode (see Chapter 3.1), the major  
22 variations are probably related to the heterogeneous composition and locally distinct  
23 magnetic behaviour of the magnetite-bearing ores. The texture of magnetites in the  
24 ores indicates in part a primarily volcanic origin, but also frequent recrystallization  
25 during later hydrothermal processes can be observed. It is likely that the hydrothermal  
26 crystallization took place over a longer period of the Early Quaternary which may have  
27 also included magnetic reversals (e.g. Alva-Valdivia et al., 2003; Naranjo et al., 2010).  
28 Our field observations and laboratory analyses of collected samples indicate a large  
29 scatter in the grain sizes, the porosity content as well as the relative amount of  
30 additional apatite (non-magnetic) and pyroxene in these rocks. These features might  
31 explain the observed variations. Other variables reported by Alva-Valdivia et al. (2003)  
32 include hysteresis parameters and highly variable Q ratios (from 0.01 to >5,000)  
33 indicating a wide range of individual properties of the magnetic carriers, compatible  
34 with pseudo-single-domain up to multi-domain status. Therefore, we attribute the  
35 observed huge variability in magnetic anomalies to local variabilities in the behaviour  
36 and magnetic properties of magnetites in near-surface rocks.

37 In areas where andesitic lavas are exposed, field surveys show only low  
38 fluctuations of the positive anomalies (Fig. 2C and 2D). This let us to hypothesize that  
39 there are no underlying local ore bodies and the lava flows have relatively  
40 homogenous compositions.

41 Measurements with the MOURA vector magnetometer show a clear northward  
42 declination between  $350^\circ$  to  $10^\circ$  N (Fig. 2G). This value is similar to the present  
43 declination of the IRGF at this site ( $3^\circ$  N) and can be explained by a very strong induced  
44 magnetization consistent with the very high susceptibilities, but relatively low Q ratios  
45 (0.01) measured in six of seven samples from El Laco Sur by Alva-Valdivia et al. (2003).  
46

## 1 **Pali Aike**

2 Magnetic surveys have been performed at some volcanoes world-wide with different  
3 spatial resolution, e.g. from Australia (Blaikie et al., 2012), New Zealand (Cassidy and  
4 Locke, 2010) and Italy (Okuma et al., 2009). In general these case studies show more  
5 and less positive magnetic anomalies (up to a few thousand nT) depending on the  
6 composition of the volcanic rocks, its cooling history and the single versus multi  
7 domain status of their magnetites (Clark, 1997). Our example of a small crater (170 m  
8 diameter) and its surroundings at the Pali Aike Volcanic Field was performed with both  
9 magnetometers and with a higher spatial resolution than the previous studies. The  
10 transect across the Pali Aike crater shown in Fig. 3C and 3D has a spatial resolution of  
11 30-50 cm in-between individual measuring points and thus provides a very good  
12 differentiation of different kinds of exposed rocks within the uppermost 1-2 m.

13 Despite the relatively high intensity of the IGRF at Pali Aike (+ 31,000 nT; Fig. 1) the  
14 transect across the crater is characterised by very high positive magnetic anomalies of  
15 up to + 12,000 nT. These anomalies are mostly pronounced along the crater rim where  
16 metre-sized melt spatters have been deposited and cooled down (Fig. 3D). The very  
17 strong magnetic signature can be explained by the fact that these lavas contain very  
18 frequent tiny magnetite crystals with single domain characteristics in their glassy  
19 matrix. The positive anomalies become much lower towards the crater infill and the  
20 outer slopes of the crater. An increasing amount of pyroclastic deposits with  
21 reorientations during the deposition processes on the steeper slopes of the crater  
22 could have reduced the integrated magnetic anomaly of these components. The  
23 relatively low local anomalies measured within the crater can be also explained by  
24 such multiple re-orientations of magnetic carriers during local redistribution processes  
25 including fluvial and eolian activities.

26 Fig. 3E shows arrows for the declination calculated from the vector data of  
27 MOURA. The values of all measurements on consolidated lava blocks (white arrows in  
28 Fig. 3E) range from 352° to 360° N. These orientations may reflect either the induced  
29 present magnetic field or paleofield directions, or a combination of both, depending  
30 on their remanence and related Q ratios which reflect often the single versus  
31 multidomain status of the basalts. Hysteresis measurements of 25 basaltic lava  
32 samples from our mapping area indicate relatively high Q-ratios of 50 to >500  
33 suggesting a strong remanence. Comparable basaltic rocks from other sites worldwide  
34 are also characterized by a very strong remanence and a predominant single domain  
35 status (Day, 1997; Dos Santos et al., 2015; Dunlop, 2002; Zhao et al., 2006). Our  
36 measurements which have been performed directly on detached lava and scoria  
37 blocks, clearly collapsed from the inner crater wall, show multiple orientations. They  
38 are indicated by red arrows in Fig. 3E and include easterly and westerly declinations.

39 The present field which has a declination of 12°N at Pali Aike, the MOURA field  
40 vectors as well as several paleodeclinations from different old Pleistocene lavas of Pali  
41 Aike (including magnetic reversals; Mejía et al., 2004) have been compiled in Fig. 3H.  
42 The estimated age of the investigated cone is approx. 1.0 Ma which suggests a normal  
43 global field for that time. MOURA declinations, ranging from 352° to 360° N, are in a  
44 very good agreement with such a normal declination as well as other normal  
45 declination constrained for other lavas from the Bruhns magnetic period (Mejía et al.,  
46 2004) rather than the present field declinations which contrast by +15°. This result

1 indicates that MOURA magnetometer could provide paleodeclinations when rocks  
2 have a very high remanence (high Q ratios).

#### 4 **Monturaqui impact crater**

5 Planetary impact craters can be characterised by a variety of magnetic anomalies  
6 which are related in particular to distinct magnetic carriers of the target rocks (e.g.  
7 mafic versus felsic or sedimentary) and the sedimentary crater infill as well as the  
8 compositions of the impactor, impact-induced melt/glass and/or impact-related  
9 hydrothermal mineralization and/or demagnetization (e.g. L'Hereux et al., 2008;  
10 Langlais and Thébault, 2011; Osinski and Pierazzo, 2013; Pilkington and Grieve, 1992;  
11 Prezzi et al., 2012).

12 At the relatively small Monturaqui crater, a coarse grid of magnetic mapping with  
13 spacings of approximately 70 m in-between single measuring points have been  
14 previously performed with a caesium magnetometer in the crater and its surroundings  
15 by Ugalde et al. (2007). The published interpolated map shows only very low magnetic  
16 anomalies in the range of less than  $\pm 200$  nT with slightly higher values in the southern  
17 and eastern sector of the crater rim. Our grid was measured with a continuous mode  
18 of the G-858 and provides a much higher resolution for the central part of the crater as  
19 well as its northern, eastern and southern rim and slopes (Fig. 4B). Our data show  
20 similar low magnetic anomalies of  $\pm 50$  nT for the crater floor as measured by Ugalde  
21 et al. (2007), whereas the eastern and north-eastern crater rim is characterised by  
22 much stronger local anomalies from -500 to  $> + 600$  nT. The transitions of the outcrops  
23 of granitic and ignimbritic target rocks shown Fig. 4C cannot be depicted by the distinct  
24 anomalies, while two northwest to southeast-trending dykes seems to responsible for  
25 some anomalies at the eastern crater rim (Fig. 4B). In general, the crater rim is  
26 characterised by a patchwork of pronounced local positive and negative anomalies  
27 which can be caused by small-scale near-surface dipoles which are probably not  
28 exposed. Not exposed fragments of the impactor, for which a diameter of  $\sim 15$  m has  
29 been modelled (Echaurren et al., 2005), represent a potential source for these  
30 magnetic anomalies. Fe-Ni spherules which have been found in impact melt/glass  
31 fragments along the eastern and western crater rim has been classified as a Group I  
32 Coarse Octahedrite (Bunch and Cassidy, 1972; Buchwald, 1975) and contain  
33 schreibersite, cohenite, fossil taenite, and kamacite as major components as well as  
34 some troilite. Laboratory analyses of these components show both high remanent  
35 magnetization as well as very high susceptibility (Ugalde et al., 2007; Ukstins Peate et  
36 al., 2010).

37 The very pronounced negative to positive anomalies from - 2,000 to + 5,000 nT  
38 which have been mapped in a local area of 50 to 100 m extension at the northeastern  
39 crater rim (Fig. 4D) also require near-surface rocks with strong dipoles. Not exposed  
40 metre-sized fragments of the iron-bearing impactor represent the most likely  
41 explanation. In this local area topographic highs are formed by ignimbrite blocks of  
42 low-magnetic signature which has been ejected from the crater and deposited on the  
43 rim during the impact event. Topographic highs formed by these blocks cause a higher  
44 distance of the magnetic sensor with respect to the probably underlying fragments of  
45 the impactor while measurements in topographic lows show much higher positive  
46 anomalies (Fig. 4F and 4G).

1

## 2 **Bahía Glaciares**

3 Mafic dykes within felsic to intermediate crustal rocks often produce pronounced local  
4 positive magnetic anomalies since they include frequent tiny magnetites (e.g. Hinze et  
5 al., 2013). However, in our case study the petrographical investigations indicate that  
6 the investigated dykes have not preserved their original magmatic mineral textures  
7 and the mineral assemblage point to an emplacement and later equilibration of the  
8 dykes under upper greenschist to amphibolite facies conditions (Bucher and Grapes,  
9 2011; Philpotts and Ague, 2009). Granites and dykes do not contain magnetite, but  
10 both contain monoclinic pyrrhotite as magnetic carrier (Dekkers, 1988, 1989; Clark,  
11 1984). This mineral appears disseminated and along veins and has been formed during  
12 hydrothermal mineralization together with Cu and Au enrichments during the  
13 exhumation (Díaz-Michelena and Kilian 2015; Nelson, 1996; Schalamuk et al., 1997).

14 Despite the lower potential of pyrrhotite to produced magnetic anomalies both  
15 magnetometers (MOURA and G-858) clearly show high resolution and slightly positive  
16 magnetic anomalies (+ 30 to + 80 nT) as well as higher susceptibilities of the dykes  
17 compared to the granites (Fig. 5E). The surface transitions between dykes and granites  
18 are characterised by very sharp anomalies within a decimetre scale. The amount of  
19 pyrrhotite (1 to 4 vol. %) which has been quantified in samples of the granite and  
20 seven dykes shows a very good correlation with the intensity of the positive anomaly  
21 (from + 160 to + 220 nT; Fig. 5F). This result confirms the potential of both  
22 magnetometers to explore local mineral enrichments which are often produced by  
23 hydrothermal processes associated with gold and copper enrichments (Direen et al.,  
24 2008).

25 Hinze et al. (2013) show examples of mafic dykes in felsic rocks where different  
26 dyke geometries cause distinct shapes of local magnetic anomalies across dykes. For  
27 the investigated Bahía Glaciares site Fig. 6 illustrates asymmetric behaviour of the  
28 magnetic anomalies along lines which have been measured across dykes which dip  
29 with between 50 to 80°. All anomalies are slightly displaced towards the shallower  
30 dipping site of the dykes indicating an integration of the magnetic signature of the  
31 uppermost 2-3 m of not exposed dykes. This fact together with the difference in  
32 contrast obtained with the magnetometers and the susceptometer (Fig. 5) points out  
33 that the magnetic field measurements average large volume sources and can lead to  
34 wrong conclusions if used as a quantitative mineralogical marker. These results  
35 indicate that a multihead (magnetometer and susceptometer) instruments would  
36 provide much better results for this purpose.

37

38

## 39 **5. Conclusions**

40

41 Several sites with a huge variability in magnetic anomalies have been analysed. As a  
42 first conclusion it can be said that the surface measurement of the sourced field often  
43 gives direct information on the composition, petrogenesis and alteration processes of  
44 the surface rocks.

1 For the study, two different magnetometers have been used. On the one hand  
2 MOURA vector magnetometer and gradiometer (< 200 g: 72 g instrument + batteries  
3 and control PC), developed for Mars **surface measurements**, as the demonstration of  
4 the technology **for planetary surveys**, and on the other hand a commercial caesium G-  
5 858 magnetometer (8 - 9 kg), also used as a reference. The studied areas are  
6 considered Mars analogues and they are representative of the intensity range of the  
7 expected anomalies on the Red Planet crust.

8 According to the comparison with the reference instrument, it has been  
9 demonstrated that MOURA magnetometer **is not only appropriate for the static**  
10 **measurement of the absolute value of the magnetic field and its temporal variations**,  
11 but is also suitable for the **prospection** measurements in the range of sourced fields  
12 from < 15,000 to > 120,000 nT and to reproduce the magnetic contrast of the terrains.  
13 Furthermore, MOURA offers vector data of the field and components of the gradient  
14 with a significantly lower mass.

15 The particular conclusions for the four case studies are the following:

- 16 1) El Laco magnetite-bearing ore deposits in the Northern Andes of Chile represents a  
17 world-wide unique example with extremely high on ground anomalies ranging from  
18 + 30,000 to + 110,000 nT, which may be comparable to highly magnetic rocks of the  
19 Noachian martian crust.

20 In this case MOURA enabled better results than G-858 due its larger range of  
21 operation (130,000 nT /axis). The declinations measured also by MOURA vectors  
22 represent the active global field due to induced-dominated magnetic rock  
23 properties with very low Q-ratios.

- 24 2) A crater in the Pali Aike Volcanic Field, in southern Chile, shows very high positive  
25 magnetic anomalies (up to 12,000 nT) of its crater rim caused by frequent tiny and  
26 single domain magnetite crystals in the matrix of basaltic lava spatters.

27 Since these rocks, like that of many other comparable volcanic rocks on Earth  
28 and other planets, have high Koenigsberger ratios (Q) and thus are dominated by  
29 their remanence, MOURA vector data have been used to determine the  
30 paleomagnetic orientation during the crater formation around 1 Ma before present.  
31 In addition, the different later reorientations of single lava blocks during their  
32 collapse from the steep inner crater wall could have been constrained by the vector  
33 data.

- 34 3) The small Monturaqui impact crater in the Atacama Desert of Northern Chile  
35 represents an analogue for many other simple type craters, like Bonneville crater on  
36 Mars. The granitoid and rhyolitic target rocks have few magnetic carriers and only  
37 weak magnetic anomalies. Pronounced anomalies along the crater rim indicate  
38 metre-sized unexposed remnants of the iron-bearing impactor (octahedrite).

39 Local mapping with a decimetre resolution, with intensities ranging from – 2,000  
40 to + 6,000 nT, corroborates the existence of such localised, strong and relatively  
41 small size (1 metre) dipoles (iron meteorite fragments) near the surface.

- 42 4) A site within the Patagonian Batholith of the southernmost Andes provides a  
43 window into deeper planetary crustal magnetic signatures. The exposed rocks  
44 include granites and mafic dykes that have been partly equilibrated at lower

1 amphibolite facies conditions, where all primary magmatic magnetites have been  
2 transformed to iron-bearing silicates, and a later hydrothermal mineralization  
3 produced pyrrhotite as only magnetic carrier.

4 The freshly exposed transitions between these granites and mafic dykes have  
5 been mapped on a decimetre-scale. Despite the very low magnetic contrast from 20  
6 to 80 nT both rock types could have been clearly distinguished. In addition, the  
7 amount of pyrrhotite, ranging from 1 to 4 vol. %, is well correlated with the positive  
8 magnetic anomalies of the dykes. This documents the potential for mapping of  
9 hydrothermal mineralization processes as well as associated gold and copper  
10 enrichments, even if the magnetic contrast is very low.

### 11 12 13 **Acknowledgements:**

14 Authors acknowledge all MOURA MetNet team; in particular, the payloads electronics  
15 engineering laboratory for their work with the magnetometer and V. Apéstigue for the  
16 technical support. This work was supported by the Spanish National Space Programme  
17 (DGI-MEC) through the project AYA2011-29967-C05-01 and the Spanish National Space  
18 Program of R&D Externalization through the project PRI-PIBUS-2011-1105.

### 19 20 **References:**

21 Acevedo R., Rabassa M., Ponce J., Martínez O., Orgeira M., Prezzi C., Corbella H.,  
22 González-Guillot M., Rocca M., Subías I. and Vásquez C.: The Bajada del Diablo  
23 astrobleme-strewn field, Argentine Patagonia: extending the exploration to  
24 surrounding areas, *Geomorphology*, 169-170, 151-164, 2012.

25 Acuña M. H., Connerney J. E. P., Wasilewski P., Lin R. P., Anderson K. A., Carlson C. W.,  
26 McFadden J., Curtis D. W., Mitchell D., Reme H., Mazelle C., Sauvaud J. A.,  
27 d'Uston C., Cros A., Medale J. L., Bauer S. J., Cloutier P., Mayhew M.,  
28 Winterhalter D., Ness N. F.: Magnetic Field and Plasma Observations at Mars:  
29 Initial Results of the Mars Global Surveyor Mission, *Science*, 279(5357), 1676-  
30 1680, 1998.

31 Alva-Valdivia, L.M., Rivas, M.L., Goguitchaichvili, A., Urrutia-Fucugauchi, J., González, J-  
32 A., Morales, I, Gómez, S., Henríquez, F., Nyström, J.O. and Naslund, H.R.: Rock-  
33 magnetic and oxide microscopic studies of the El Laco iron-ore deposits,  
34 Chilean Andes, and implications for magnetic anomaly modelling, *International*  
35 *Geology Review*, 45 (6), 533 – 547, 2003.

36 Balta, J.B. and McSween, H.Y.: Water and the composition of Martian magmas,  
37 *Geology*, 41(10), 1115 - 1118, 2013.

38 Blaikie, T.N., Ailleres, L., Cas, R.A.F. and Betts, P.G.: Three-dimensional potential field  
39 modelling of a multi-vent maar-diatreme — The Lake Coragulac maar, Newer  
40 Volcanics Province, south-eastern Australia, *Journal of Volcanology and*  
41 *Geothermal Research*, 235–236, 70–83, 2012.

42 Bolós, X., Barde-Cabusson, S., Pedrazzi, D., Martí, J., Casas, A., Himi, M. and Lovera, R.:  
43 Investigation of the inner structure of La Crosa de Sant Dalmai maar (Catalan  
44 Volcanic Zone, Spain), *Journal of Volcanology and Geothermal Research*, 247–

- 1 248, 37–48, 2012.
- 2 Breitsprecher, K. and Thorkelson, D.J.: Neogene kinematic history of Nazca–Antarctic–  
3 Phoenix slab windows beneath Patagonia and the Antarctic Peninsula,  
4 Tectonophysics, 464, 10 – 20, 2009.
- 5 Breuer, S., Kilian, R., Weinrebe, W., Schörner, D. and Behrmann, J.: Glacier and tectonic  
6 control on fjord morphology and sediment deposition in the Magellan region  
7 (53°S), Marine Geology, 346, 31 – 46, 2013.
- 8 Bucher, K., and Grapes, R.: Petrogenesis of metamorphic rocks. Springer, 8<sup>th</sup> edition,  
9 428 pp., Berlin-Heidelberg, DOI 10.1007/978-3-540-74169-5, 2011.
- 10 Buchwald, W.: Handbook of Iron Meteorites, Their History, Distribution, Composition,  
11 and Structure, Volume 3. Berkeley, University of California Press, 1975.
- 12 Bunch, T.E. and Cassidy, W.A.: Petrographic and electron microprobe study of the  
13 Monturaqui Impactite, Contrib. Mineral. Petrol. 36, 95-112, 1972.
- 14 Carter, J. and Poulet, F.: Ancient plutonic processes on Mars inferred from the  
15 detection of possible anorthositic terrains, Nature Geoscience, 6, 1008 – 1012,  
16 2013.
- 17 Cassidy, J. and Locke, C.A.: The Auckland volcanic field, New Zealand: Geophysical  
18 evidence for structural and spatio-temporal relationships, Journal of  
19 Volcanology and Geothermal Research, 195, 127-137, 2010.
- 20 Clark, D.A.: Hysteresis properties of sized dispersed monoclinic pyrrhotite grains,  
21 Geophysical Research Letters, 11, 173 – 176, 1984.
- 22 Clark, D.A.: Magnetic petrophysics and magnetic petrography: aids to geological  
23 interpretation of magnetic surveys, AGSO Journal of Australian Geology and  
24 Geophysics, 17, 83 – 103, 1997.
- 25 Connerney, J.E.P., Acuña, M.H., Ness, N.F., Kletetschka, G., Mitchell, D.L., Lin, R.L. and  
26 Reme, H.: Mars magnetic field - Results from the Mars Global Surveyor, PNAS,  
27 102 (42), 14970-14975, 2005.
- 28 Dare, S.A.S., Barnes, S.-J. and Beaudoin, G.: Did massive magnetite “lava flows” of El  
29 Laco (Chile) form by magmatic or hydrothermal processes? New constraints  
30 from magnetite composition by LA-ICP-MS, Mineral Deposita, Doi  
31 10.1007/s00126-014-0560-1, 2014.
- 32 Dekkers, M.J.: Magnetic properties of natural pyrrhotite. Part I: behaviour of initial  
33 susceptibility and saturation-magnetization-related rock-magnetic parameters  
34 in a grain size dependend framework, Physics of the Earth and Planetary  
35 Interiors, 52, 376 – 393, 1988.
- 36 Dekkers, M.J.: Magnetic properties of natural pyrrhotite. Part II: high and low  
37 temperature behaviour of Jrs and TRM as function of grain size, Physics of the  
38 Earth and Planetary Interiors 57, 266 – 283, 1989.
- 39 Díaz-Michelena, M., Sanz, R., Cerdán, M. F. and Fernández, A.B., 2015. Calibration of  
40 QM-MOURA three-axis magnetometer and gradiometer, Geosciences  
41 Instrumentation, Methods and Data Systems, 4, 1-18, 2015a.
- 42 Díaz-Michelena, M. and Kilian, R.: MOURA Martian magnetometer potential for high

- 1 resolution magnetic mapping, General Assembly 2013. Geophysical Research  
2 Abstracts, Vol. 15, EGU2013-1886, 2013.
- 3 Díaz Michelena, M., Cobos Arribas, P. and Aroca Hernández-Ros, C. *Lock-in amplifiers*  
4 *for AMR sensors*, *Sensors and Actuators A: Physical* 222, 149-159, 2015.
- 5 Díaz-Michelena, M. and Kilian, R.: Magnetic signatures of the orogenic crust of the  
6 Patagonian Andes with implication for planetary exploration, *Physics of the*  
7 *Earth and Planetary Interiors*, doi:10.1016/j.pepi.2015.08.005, 2015.
- 8 Direen, N.G., Pfeiffer, K.A. and Schmidt, P.W.: Strong remanent magnetization in  
9 pyrrhotite: A structurally controlled example from the Paleoproterozoic Tanmi  
10 orogenic gold province, northern Australia, *Precambrian Research* 165, 96 –  
11 106, 2008.
- 12 Dos Santos, E., Gattacceca, J., Rochette, P., Scorzelli, R.B., Fillion, G. et al. Magnetic  
13 hysteresis properties and <sup>57</sup>Fe Mössbauer spectroscopy of iron and stony-iron  
14 meteorites: Implications for mineralogy and thermal history, *Physics of the*  
15 *Earth and Planetary Interiors*, 242, 50-64, 2015.
- 16 Dunlop, D.J.: Theory and application of the Day plot (Mrs/Ms versus Hcr/Hc). 2.  
17 Application to data for rocks, sediments, and soils, *Journal of Geophysical*  
18 *Research*, 107 (B3), 10.1029/201JB000487, 2002b.
- 19 Echaurren, A., Ocampo, C., Rocca, M.C.L.: A mathematic model for the Monturaqui  
20 impact crater, Chile, South America, 68<sup>th</sup> Annual Meteoritical Society Meeting,  
21 5004 p., 2005.
- 22 Eppelbaum, L.V.: Quantitative Interpretation of Magnetic Anomalies from Bodies  
23 Approximated by Thick Bed Models in Complex Environments, *Environmental*  
24 *Earth Sciences*, 74, (7), 5971-5988, 2015.
- 25 Eppelbaum L.V. and Mishne A.R: Unmanned airborne magnetic and VLF investigations:  
26 effective geophysical methodology of the near future, *Positioning*, 2(3), 112–  
27 133, 2011.
- 28 Francis, D.: Columbia Hills - An exhumed layered igneous intrusion on Mars? *Earth and*  
29 *Planetary Science Letters*, 310, 59 – 64, 2011.
- 30 Gardeweg, M., and Ramírez, C. F.: Hoja Rio Zapaleri, II Region de Antofagasta:  
31 Santiago, Chile, Servicio Nacional de Geología y Minería, Carta Geológica de  
32 Chile, 66, 89 p., 1985.
- 33 Gobashy, M.M. and Al-Garni, M.A.: High Resolution Ground Magnetic Survey (HRGM)  
34 for determining the optimum location of subsurface dam in Wadi Nu'man,  
35 Makkah Al Mukarammah, KSA, *JKAU: Earth Sci.*, 19, 57-83, 2008.
- 36 Grant, A. J., Arvidson, R., Bell III, J.F., Cabrol, N.A., Carr, M.H., Christensen, P.,  
37 Crumpler, L., Des Marais, D. J., Ehlmann, B. L., Farmer, J., Golombek, M., Grant,  
38 F.D., Greeley, R., Herkenhoff, K., Li, R., McSween, H. Y., Ming, D. W., Moersch,  
39 J., Rice Jr., J. W., Ruff, S., Richter, L., Squyres, S., Sullivan, R. *and* Weitz, C. :  
40 Surficial Deposits at Gusev Crater Along Spirit Rover Traverses, *Science*, 305  
41 (5685), 807–810, 2004.
- 42 Greenough, J.D. and Yacoby, A.: A comparative geochemical study of Mars and Earth  
43 basalt petrogenesis, *Can. J. Earth Sci.*, 50, 78-93, 2013.

- 1 Groschner, C., Lan, S., Wise, A., Leary, A., Lucas, M., Park, C., Laughlin, D., Díaz-  
2 Michelena, M. and McHenry, M.: The role of atmosphere on exsolution  
3 processes and magnetic properties of ulvospinel, *IEEE Transactions on*  
4 *Magnetics* 49(7), 4273 – 4276, 2013.
- 5 Hervé, F., Pankhurst, R.J., Fanning, C.M., Calderón, M. and Yaxley, G.M.: The South  
6 Patagonian batholith: 150 my of granite magmatism on a plate margin, *Lithos*,  
7 97, 373 – 394, 2007.
- 8 Hinze, W.J., Von Frese R.R.B. and Saad, A.H.: Gravity and magnetic Exploration,  
9 Principles, Practices and Applications, Cambridge University Press, 525 p., 2013.
- 10 Ialongo, S., Fedi, M. and Florio, G.: Invariant models in the inversion of gravity and  
11 magnetic fields and their derivatives. *Applied Geophysics*, 110, 51–62, 2014.
- 12 Jonnsson, E., Troll, V.R., Högdahl, K., Harris, C., Weis, F., Nilsson, K. and Skelton, A.  
13 Magmatic origin of giant ‘Kiruna-type’ apatite-iron-oxide ores in Central  
14 Sweden, *Scientific Reports*, 3, 1644, Doi:10.1038/srep01644, 2013.
- 15 Kereszturi, G. and Németh, K.: Monogenetic Basaltic Volcanoes: Genetic Classification,  
16 Growth, Geomorphology and Degradation, In: Németh, K. (ed.): *Updates in*  
17 *Volcanology - New Advances in Understanding Volcanic Systems*, ISBN: 978-  
18 953-51-0915-0, InTech: 3-88. DOI: 10.5772/51387, 2012.
- 19 Kilian, R. and Behrmann, J. H.: Geochemical constraints on the sources of continent-  
20 related deep sea sediments and their recycling in arc magmas of the Southern  
21 Andes, *Journal of Geol. Soc. London*, 160, 57-70, 2003.
- 22 Klobberdanz, C. M.: Geochemical analysis of the Monturaqui Impact Crater, Chile, Ph  
23 thesis, University of Iowa, 2010.
- 24 Lan, S., Groschner, C., Runco, J., Wise, A., Díaz-Michelena, M., Laughlin, D. and  
25 McHenry, M.: Phase identification and temperature-dependent magnetization  
26 of Ti-rich titanomagnetite in different atmospheres magnetics, *IEEE*  
27 *Transactions on Magnetics*, 49 (7), 4314 – 4318, 2013.
- 28 Langlais B. and E. Thébault, E.: Predicted magnetic signatures of Martian  
29 (de)magnetized impact craters and a statistical comparison with observations,  
30 *Icarus*, 212(2), 568-578, 2011.
- 31 L’Heureux, E., Ugalde, H., Milkereit, B., Boyce, J., Morris, W., Eyles, N., and Artemieva,  
32 N.: Using vertical dikes as a new approach to constraining the size of buried  
33 craters: An example from Lake Wanapitej, Canada, *in* Kenkmann, T., Hörz, F.,  
34 and Deutsch, A., eds., *Large meteorite impacts III: Geological Society of America*  
35 *Special Paper* 384, p. 43 – 50, 2005.
- 36 Lillis, R.J., Robbins, S., Manga, M., Halekas, J.S. and Frey, H.V.: Time history of the  
37 Martian dynamo from crater magnetic field analysis, *Journal Geophysical*  
38 *Research: Planets*, 118, 1–24, doi:10.1002/jgre.20105, 2013.
- 39 Maksaev, V., Gardeweg, M., Ramírez, C. F. and Zentilli, M.: Aplicación del método  
40 trazas de fisión (fission track) a la datación de cuerpos de magnetita de El Laco  
41 e Incahuasi en el altiplano de la región de Antofagasta, *Congreso Geológico*  
42 *Chileno 5th*, Santiago, v. 1, p. B1–B23, 1988.

- 1 McEnroe, S.A., Brown, L.L. and Robinson, P. (2004): Earth analog for Martian magnetic  
2 anomalies: remanence properties of hemo-ilmenite norites in the Bjerkreim-  
3 Sokndalintrusion, Rogaland, Norway, *Journal of Applied Geophysics* 56: 195–  
4 212.
- 5 McEnroe S.A., Fabian, K., Robinson, P., Gaina, C. and Brown, L.L.: Crustal magnetism,  
6 lamellar magnetism and rocks that remember, *Elements*, 5, 241 – 246, 2009.
- 7 Mejia, V., Opdyke, N.D., Vilas, J.F., Singer, B.S. and Stoner, J.S.: Plio-Pleistocene time-  
8 averaged field in southern Patagonia recorded in lava flows, *Geochemistry*  
9 *Geophysics Geosystems*, 5(3), DOI:10.1029/2003GC000633a, 2004.
- 10 Morschhauser, A., Lesur, V. and Grott, M. A spherical harmonic model of the  
11 lithospheric magnetic field of Mars, *Journal of Geophysical Research*, 119, 6,  
12 1162-1188, 2014.
- 13 Naranjo, J.A., Henríquez, F. and Nyström J.O.: Subvolcanic contact metasomatism at El  
14 Laco Volcanic Complex, Central Andes, *Andean Geology*, 37, 110-120, 2010.
- 15 Nelson, E.P.: Suprasubduction Mn mineralization: Metallo-tectonic Terranes of the  
16 Southernmost Andes, pp. 315-330, In *Geophysical Monograph* 98, Eds.: Bebout,  
17 G.E. et al., 1996.
- 18 Okuma, S., Stotter, C., Supper, R., Nakatsuka, T., Furukawa, R. and Motschka, K.:  
19 Aeromagnetic constraints on the subsurface structure of Stromboli Volcano,  
20 Aeolian Islands, Italy, *Tectonophysics*, 478, 19–33, 2009.
- 21 Osinski, G.R. and Pierazzo, E.: *Impact cratering: Processes and products*, Wiley, 330 p.,  
22 2013.
- 23 Philpotts, A. and Ague, J.: *Principles of Igneous and Metamorphic Petrology*, 684 p.,  
24 Cambridge University Press, 2009.
- 25 Pilkington, M. and Grieve, R.: The geophysical signature of terrestrial impact craters,  
26 *Reviews of Geophysics*, 30, 161-181, 1992.
- 27 Robbins, S.J., Hynes, B.M., Lillis, R.J. and Bottke, W.F.: Large impact crater histories of  
28 Mars: The effect of different model crater age techniques, *Icarus*, 225, 173–  
29 184, 2013.
- 30 Prezzi C., Orgeira M., Acevedo R., Ponce J., Martinez O., Rabassa J., Corbella H.,  
31 Vásquez C., González-Guillot M. and Subías I.: Geophysical characterization of  
32 two circular structures of Bajada del Diablo (Argentina): indication of impact  
33 origin, *Physics of the Earth and Planetary Interiors*, 192-193, 21-34, 2012.
- 34 Sánchez, I. and Cassidy, W.: A previously undescribed meteorite crater in Chile, *Journal*  
35 *of Geophysical Research*, 71, 4891-4895, 1966.
- 36 Schalamuk, I.B., Zubia, M., Genini, A. and Fernández, R.R.: Jurassic epithermal Au-Ag  
37 deposits of Patagonia, Argentina, *Ore Geology Reviews* 12, 173 – 186, 1997.
- 38 Sillitoe, R.H. and Burrows, D.R.: New field evidence bearing on the origin of the El Laco  
39 magnetite deposits, Northern Chile, *Economic Geology*, 97, 1101-1109, 2002,
- 40 Skewes, M.A. and Stern C.R.: Petrology and geochemistry of alkali basalts and  
41 ultramafic inclusions from the Pali-Aike Volcanic Field in southern Chile and the

1 origin of the Patagonian Plateau lavas, *Journal of Volcanology and Geothermal*  
2 *Research*, 6, 3-25, 1979.

3 Stolpe, E.M., Baker, M. B., Newcombe, M. E., Schmidt, M. E., Treiman, A. H., Cousin, A.,  
4 Dyar, M. D., Fisk, M. R., Gellert, R., King, P. L., Leshin, L., Maurice, S., McLennan,  
5 S. M., Miniti, M. E., Perrett, G., Rowland, S., Sautter, V., Wiens, R. C. , MSL  
6 Science Team: The petrochemistry of Jake\_M: A Martian Mugarite, *Science*,  
7 341, 6153. DOI: 10.1126/science.1239463, 2013.

8 Ugalde, H., Valenzuela, M. and Milkereit, B.: An integrated geophysical and geological  
9 study of the Monturaqui impact crater, Chile, *Meteoritics & Planetary Science*,  
10 42(12), 2153-2163, 2007.

11 Ukstins Peate, I., Klobberdanz, C., Peate, D.W., Chung Wan, L., Cabrol, N., Grin, E.,  
12 Piatek, J. and Chong, G.: Non-modal melting of target rocks to produce >ite at  
13 Monturaqui Crater, Chile, 41st Lunar and Planetary Science Conference, 1-5  
14 March 2010, Houston, Texas, 2010.

15 Urrutia-Fucugauchi, J., Trigo-Huesca, A. and Pérez-Cruz L.: Magnetic links among lava  
16 flows, tuffs and the underground plumbing system in a monogenetic volcano,  
17 derived from magnetics and paleomagnetic studies, *Physics of the Earth and*  
18 *Planetary Interior*, 212-213, 10-18, 2012.

19 Valesco, F. and Tornos, F.: Insights on the effect of hydrothermal alteration in the El  
20 Laco magnetite deposits, *Revista de la Sociedad Española de Mineralogía*, 16,  
21 2012.

22 Wray, J.J., Hansen, S.T., Dufek, J., Swayze, G.A., Murchie, S.L., Seelos, F.P., Skok, J.R.,  
23 Irwin III, R.P. and Ghiorso, M.S.: Prolonged magmatic activity on Mars inferred  
24 from the detection of felsic rocks, *Nature Geoscience*, 6, 1013 - 1017, 2013.

25 Zhao, Xixi, et al. Unraveling the magnetic carriers of igneous cores from the Atlantic,  
26 Pacific, and the southern Indian oceans with rock magnetic characterization,  
27 *Physics of the Earth and Planetary Interiors*, 156, 294-328.

28  
29  
30  
31
